# Supplementary material
Source: PubMed Central journal article supplement (PMC4978868)
Supplement: rstb20150310supp1.pdf [file rstb20150310supp1.pdf]

Zaloumis NP and Bond WJ. 2016. Reforestation or conservation? The attributes of old growth grasslands in South Africa. *Phil. Trans. R. Soc. B* **371** doi: 10.1098/rstb.2015.0310

**Supplementary Figure 1: Examples of underground storage organs found in South African grasslands**

a. *Raphionacme lucens*

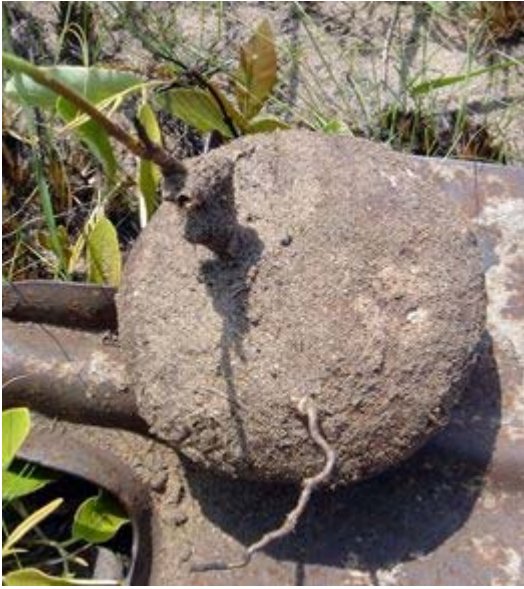

b. *Gnidia kraussiana*

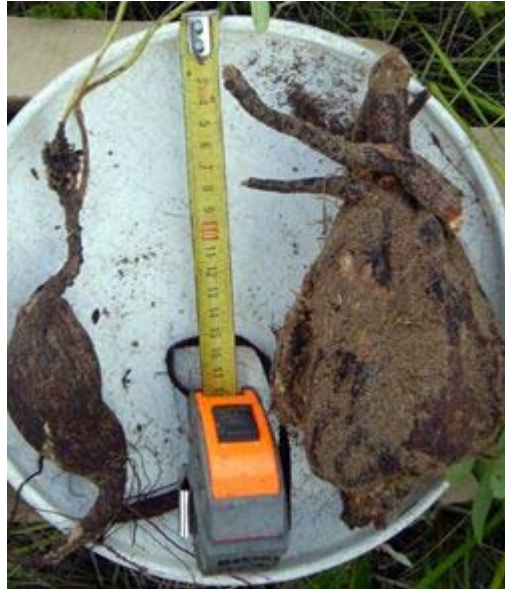

c. *Crinum macowanii*

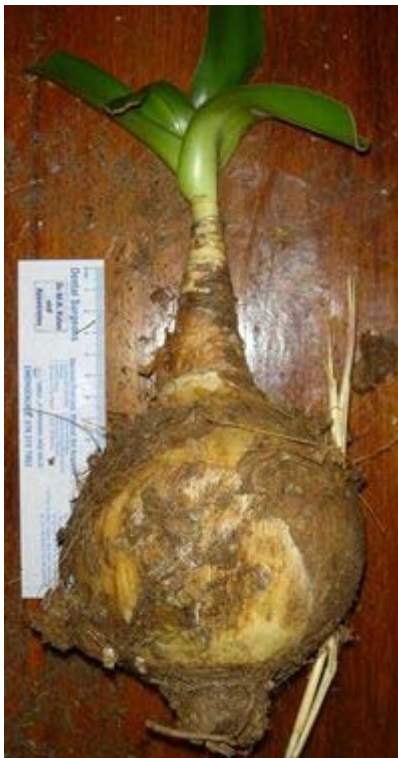

d. *Hypoxis* sp.

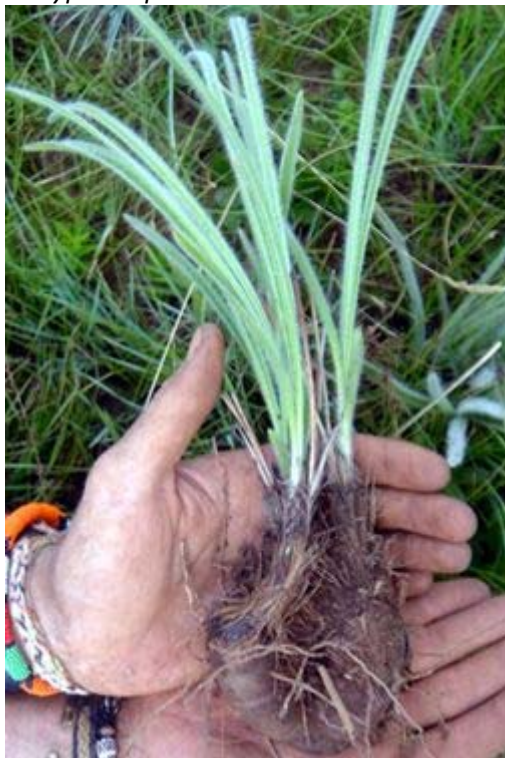

**Supplementary Table 1. The five dominant species as measured by cover for each study area and natural versus secondary grasslands.**

| Dominant Species                                      |                    |                                 |             |
|-------------------------------------------------------|--------------------|---------------------------------|-------------|
| Natural treatment                                     | Growth Form        | Secondary Treatment             | Growth Form |
| MNR                                                   |                    |                                 |             |
| <i>Themeda triandra</i>                               | Grass              | <i>Eragrostis curvula</i>       | Grass       |
| <i>Rendlia altera</i>                                 | Grass              | <i>Rumex crispus</i>            | Forb*       |
| <i>Panicum natalense</i>                              | Grass              | <i>Helichrysum</i> species 1    | Forb        |
| <i>Koeleria capensis</i>                              | Grass              | <i>Helichrysum</i> species 2    | Forb        |
| <i>Eriosema kraussianum</i>                           | Forb               | <i>Helichrysum splendidum</i>   | Shrub       |
| BKNR                                                  |                    |                                 |             |
| <i>Themeda triandra</i>                               | Grass              | <i>Eragrostis curvula</i>       | Grass       |
| <i>Rendlia altera</i>                                 | Grass              | <i>Cymbopogon</i> species       | Grass       |
| <i>Eragrostis racemosa</i>                            | Grass              | <i>Trichopteryx</i> species     | Grass       |
| <i>Eriosema kraussianum</i>                           | Forb               | <i>Conostomum natalense</i>     | Forb        |
| <i>Aeschynomene rehannii</i> var. <i>leptobortrya</i> | Forb               | <i>Ophioglossum reticulatum</i> | Fern        |
| ESI                                                   |                    |                                 |             |
| <i>Themeda triandra</i>                               | Grass              | <i>Dactyloctenium aegyptium</i> | Grass       |
| <i>Aristida junciformis</i>                           | Grass              | <i>Eragrostis ciliaris</i>      | Grass       |
| <i>Vernonia oligocephala</i>                          | Forb               | <i>Mariscus albomarginatus</i>  | Sedge       |
| <i>Pentanisia prunelloides</i>                        | Forb               | <i>Asteraceae</i> species       | Forb        |
| <i>Parinari capensis</i>                              | Geoxylic suffrutex | <i>Cassytha filiformis</i>      | Forb*       |

\*- Alien species.
